# Supplementary material
Source: ML conference proceedings conference paper supplement (https://proceedings.mlr.press/v97/tiomoko19a.html)
Supplement: Supplementary file 1 [file tiomoko19a-supp.pdf]

000  
001  
002  
003  
004  
005  
006  
007  
008  
009  
010  
011  
012

# Supplementary Material

## Analytic expressions for $\nabla h_X(M)$

013  
014  
015  
016  
017  
018

### Abstract

This document contains the main technical arguments for the computation of the gradient expressions  $\nabla h_X(M)$  introduced as Propositions 1–8 in the main article. Further details on similar derivations can be found in (Couillet et al., 2018).

019  
020

### 1. Derivation of the gradient for the examples provided in the article

021  
022 Our main concern is to find an analytical expression of the gradient defined as:

$$023 \quad \nabla h_X(M) = \frac{-\hat{\delta}(M, X)}{\pi \iota p} \oint_{\hat{\Gamma}} g(-m_{\bar{\mu}_p}(z; M)) \operatorname{sym} \left( \hat{C}(M^{-1}\hat{C} - zI_p)^{-2} \right) dz. \quad (1)$$

025 Equation (1) can be written as:

$$026 \quad \nabla h_X(M) = \frac{-\hat{\delta}(M, X)}{\pi \iota p} \operatorname{sym} \left( \hat{C}U \left( \oint_{\hat{\Gamma}} g(-m_{\bar{\mu}_p}(z; M)) (\Lambda - zI_p)^{-2} dz \right) U^T \right). \quad (2)$$

029 where  $M^{-1}\hat{C} = U\Lambda U^T$  in its spectral decomposition. Our main focus is on the diagonal matrix

$$030 \quad A \equiv \frac{1}{2\iota\pi} \oint_{\hat{\Gamma}} g(-m_{\bar{\mu}_p}(z; M)) (\Lambda - zI_p)^{-2} dz$$

032 and particularly on its  $k$ -th diagonal element

$$033 \quad A_{kk} = \frac{1}{2\iota\pi} \oint_{\hat{\Gamma}} \frac{g(-m_{\bar{\mu}_p}(z; M))}{(\lambda_k - z)^2} dz \quad (3)$$

035 with  $\Lambda = \operatorname{diag}(\lambda_1, \dots, \lambda_p)$ .

036 To solve (3), we use elementary properties of the rational function  $m_{\bar{\mu}_p}(z; M)$  that we recall is defined as

$$037 \quad m_{\bar{\mu}_p}(z; M) = \frac{c}{p} \sum_{i=1}^p \frac{1}{\lambda_i - z} + \frac{1-c}{z}.$$

038 Remarking that the poles of  $m_{\bar{\mu}_p}(z; M)$  are  $\{\lambda_i\}_{i=1}^p$  and 0, and that  $\{\xi_i\}_{i=1}^p$  are the zeros of  $m_{\bar{\mu}_p}(z; M)$  (see (Couillet et al., 2018) for details), we have :

$$039 \quad m_{\bar{\mu}_p}(z; M) = \frac{\prod_{i=1}^p (z - \xi_i)}{z \prod_{i=1}^p (z - \lambda_i)}.$$

040 With these ingredients, we can evaluate  $A_{kk}$  for various functions  $f$  (recall that  $g(z) = f(1/z)$ ).

041  
042  
043  
044  
045  
046  
047  
048  
049  
050  
051  
052  
053  
054

055 **1.1. Case  $f(t) = t$**

056 For this case,  $g(t) = \frac{1}{t}$ , and thus the integrand of  $A_{kk}$  is

057  
058  
059  
060  
061

$$I = \frac{z \prod_{\substack{i=1 \\ i \neq k}}^p (z - \lambda_i)}{(z - \lambda_k) \prod_{i=1}^p (z - \xi_i)}.$$

062 Under this rational form,  $A_{kk}$  is easy to evaluate since it only requires to evaluate the residue for each pole of  $I$ :

- 063  
064 • the first order pole  $\lambda_k$  for which the residue  $R_1$  is given by

065  
066  
067  
068  
069  
070  
071  
072

$$\begin{aligned} R_1 &= \lim_{z \rightarrow \lambda_k} \frac{z \prod_{\substack{i=1 \\ i \neq k}}^p (z - \lambda_i)}{\prod_{i=1}^p (z - \xi_i)} \\ &= \lim_{z \rightarrow \lambda_k} \frac{1}{(z - \lambda_k) m_{\tilde{\mu}_p}(z)} \\ &= -\frac{p}{c} \end{aligned}$$

- 073  
074 • and the first order poles  $\xi_j, j \in \{1, \dots, p\}$  for which the residue  $R_2$  is given by:

075  
076  
077  
078  
079  
080  
081  
082  
083  
084

$$\begin{aligned} R_2 &= \sum_{j=1}^p \lim_{z \rightarrow \xi_j} \frac{z \prod_{i=1}^p (z - \lambda_i)}{(z - \lambda_k)^2 \prod_{\substack{i=1 \\ i \neq j}}^p (z - \xi_i)} \\ &= \sum_{j=1}^p \frac{1}{(\xi_j - \lambda_k)^2} \lim_{z \rightarrow \xi_j} \frac{z - \xi_j}{m_{\tilde{\mu}_p}(z)} \\ &= \sum_{j=1}^p \frac{1}{(\xi_j - \lambda_k)^2 m'_{\tilde{\mu}_p}(\xi_j)} \end{aligned}$$

085 Putting the  $p + 1$  residues together then yields:

086  
087  
088  
089

$$A_{kk} = -\frac{p}{c} + \sum_{j=1}^p \frac{1}{(\xi_j - \lambda_k)^2 m'_{\tilde{\mu}_p}(\xi_j)}.$$

090 **1.2. Case  $f(t) = \log(t)$**

091 For this case,  $g(t) = -\log(t)$  and therefore the integrand of  $A_{kk}$  becomes

092  
093  
094  
095  
096

$$I = -\frac{\log\left(\frac{\prod_{i=1}^p (z - \xi_i)}{z \prod_{i=1}^p (z - \lambda_i)}\right)}{(\lambda_k - z)^2}$$

097 Elementary functional analysis allows us to find the discontinuities of this multi-valued function (the  $z$ 's for which the argument of the logarithm function is negative). This set of points, or branch cuts, are exactly the segments  $[\xi_i, \lambda_i]$ ,  $i = 1, \dots, p$ . These segments lie inside the integration contour  $\Gamma$ , that needs to be modified for proper integration; the new contour, denoted  $\Gamma_n$  is depicted in Figure 1.

101 Under  $\Gamma_n$ ,  $A_{kk}$  is the sum of several integrals, subdivided in four types:

- 102  
103 • integrals over the circles surrounding  $\{\xi_j\}_{j=1}^p$  which, thanks to the variable change  $z = \xi_j + \epsilon e^{i\theta}$ , reduce to

104  
105  
106  
107  
108  
109

$$\lim_{\epsilon \rightarrow 0} - \int_{\epsilon}^{2\pi - \epsilon} \frac{\log\left(\frac{\prod_{i=1}^p (\xi_j + \epsilon e^{i\theta} - \xi_i)}{\epsilon e^{i\theta} \prod_{\substack{i=1 \\ i \neq j}}^p (\xi_j + \epsilon e^{i\theta} - \lambda_i)}\right)}{(\lambda_k - \xi_j - \epsilon e^{i\theta})^2} i\epsilon e^{i\theta} = 0$$

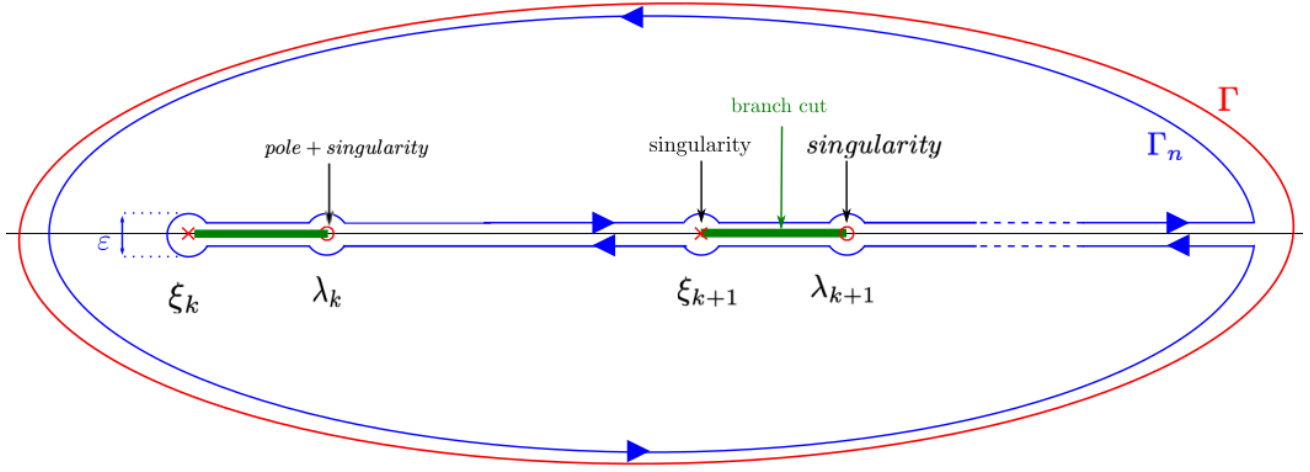

Figure 1. Contour deformation

- integrals over the circles surrounding  $\{\lambda_i\}_{i=1}^p$  which are null following the same line of reasoning as for  $\xi_i$ .
- real integrals over the segments  $[\xi_i, \lambda_i]$  which can be computed by remarking that the log function has a discontinuity of  $2i\pi$  at the branch cut.

$$\begin{aligned}
 & \frac{1}{2i\pi} \sum_{j=1}^p \int_{\xi_j+\epsilon}^{\lambda_j-\epsilon} \frac{\log(|m_{\bar{\mu}_p}|) + i\pi - \log(|m_{\bar{\mu}_p}|) + i\pi}{(\lambda_k - z)^2} \\
 &= \sum_{j=1}^p \int_{\xi_j+\epsilon}^{\lambda_j-\epsilon} \frac{1}{(\lambda_k - z)^2} \\
 &= \sum_{j=1}^p \lim_{z \rightarrow \lambda_j} \frac{1}{(\lambda_k - z)} - \frac{1}{(\lambda_k - \xi_j)} \\
 &= \sum_{\substack{j=1 \\ j \neq k}}^p \frac{1}{(\lambda_k - \lambda_j)} - \sum_{j=1}^p \frac{1}{(\lambda_k - \xi_j)} + \lim_{z \rightarrow \lambda_k} \frac{1}{(\lambda_k - z)}
 \end{aligned}$$

- the integral over the circle surrounding  $\lambda_k$  computed by remarking that  $\lambda_k$  is a second order pole

$$\begin{aligned}
 & \lim_{z \rightarrow \lambda_k} \frac{\partial}{\partial z} (\log(-m_{\bar{\mu}_p}(z; M))) \\
 &= \lim_{z \rightarrow \lambda_k} \sum_{j=1}^p \frac{1}{z - \xi_j} - \frac{1}{z} - \sum_{j=1}^p \frac{1}{z - \lambda_j} \\
 &= \sum_{j=1}^p \frac{1}{\lambda_k - \xi_j} - \frac{1}{\lambda_k} - \sum_{\substack{j=1 \\ j \neq k}}^p \frac{1}{\lambda_k - \lambda_j} - \lim_{z \rightarrow \lambda_k} \frac{1}{z - \lambda_k}
 \end{aligned}$$

where the second line is obtained remarking that:

$$\frac{m'_{\bar{\mu}_p}(z; M)}{m_{\bar{\mu}_p}(z; M)} = \sum_{j=1}^p \frac{1}{z - \xi_j} - \frac{1}{z} - \sum_{j=1}^p \frac{1}{z - \lambda_j}.$$

---

165 Combining these integrals then yields to the solution of the integral:

$$166 A_{kk} = -\frac{1}{\lambda_k}.$$

167  
168  
169 **1.3. Case  $f(t) = \log(1 + st)$**

170 For this case, the integrand of  $A_{kk}$  can be derived similarly as in the case of the logarithm by noting that the argument  
171 of the logarithm  $(1 - s/m_{\bar{\mu}_p}(z))$  is a polynomial for which the poles are  $\lambda_i$  and 0. The zeros are in number  $p + 1$  and  
172 denoted  $\kappa_i$ ,  $i = 0, \dots, p$  with  $\kappa_0 < 0 < \kappa_1 < \dots < \kappa_p$ ; in particular, only  $\kappa_1, \dots, \kappa_p$  are inside the integration contour  
173 (see (Couillet et al., 2018) for details). Therefore, the integrand is written similarly as for the log function as:

$$174 I = -\frac{\log\left(\frac{\prod_{i=0}^p (z - \kappa_i)}{z \prod_{i=1}^p (z - \lambda_i)}\right)}{(\lambda_k - z)^2}.$$

175  
176  
177 The integration contour can be deformed as for the log function. Using similar integration techniques, the calculus then  
178 yields to the solution derived in the article.

179  
180  
181 **1.4. Case  $f(t) = \log^2(t)$**

182 Here  $g(t) = f(t) = \log^2(t)$  and the integrand for this case is simply

$$183 I = -\frac{\log^2\left(\frac{\prod_{i=1}^p (z - \xi_i)}{z \prod_{i=1}^p (z - \lambda_i)}\right)}{(\lambda_k - z)^2}.$$

184  
185  
186 Again, we use here exactly the same line of work performed on the  $\log(t)$  and  $\log(1 + st)$  functions. Technical difficulties  
187 however arise when addressing the real integrals which involve products of logarithms and rational functions. These  
188 difficulties are mostly cumbersome calculus which are addressed similar to (Couillet et al., 2018).

189  
190  
191 The treatment of the complex integrals resulting from the estimation of  $C^{-1}$  is performed similarly.

192  
193  
194 **References**

195  
196  
197 Couillet, R., Tiomoko, M., Zozor, S., and Moisan, E. Random matrix-improved estimation of covariance matrix distances.  
198 *arXiv preprint arXiv:1810.04534*, 2018.

199  
200  
201  
202  
203  
204  
205  
206  
207  
208  
209  
210  
211  
212  
213  
214  
215  
216  
217  
218  
219
